# Supplementary material for: New Sinularianin Sesquiterpenes from Soft Coral Sinularia sp
Source: PubMed Central journal article supplement (PMC3877883; doi:10.3390/md11124741), 2013-12-02
Supplement: marinedrugs-11-04741-s001.pdf [file marinedrugs-11-04741-s001.pdf]

# Supplementary Information

Figure S1. HR-ESI-MS of sinularianin C (3).

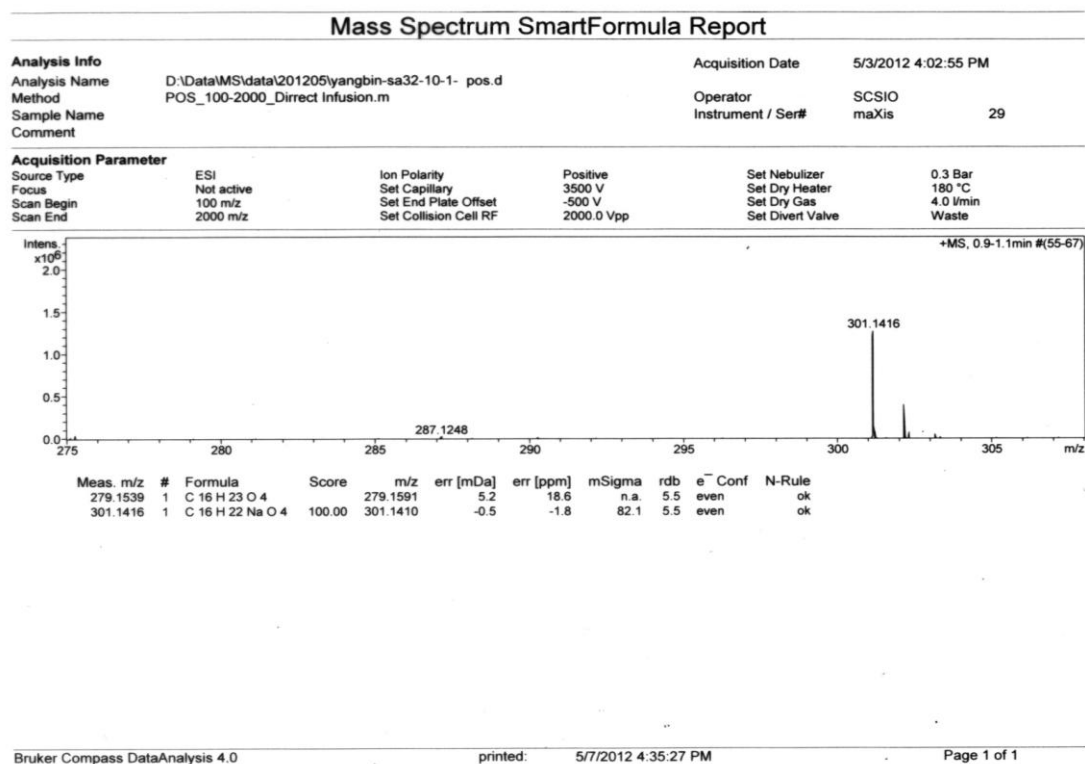

Figure S2. <sup>1</sup>H NMR Spectrum of sinularianin C (3) in CD<sub>3</sub>OD (500 MHz).

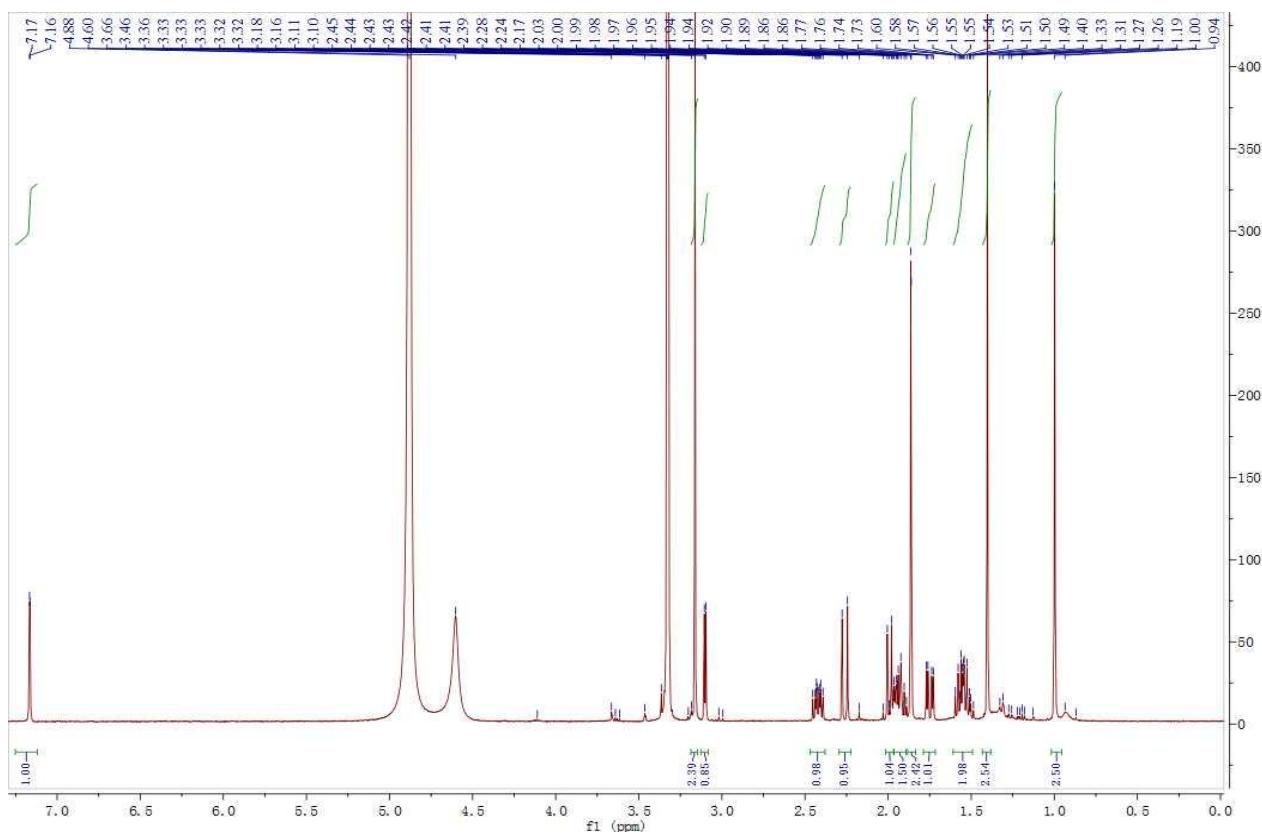

**Figure S3.**  $^{13}\text{C}$  NMR Spectrum of sinularianin C (**3**) in  $\text{CD}_3\text{OD}$  (125 MHz).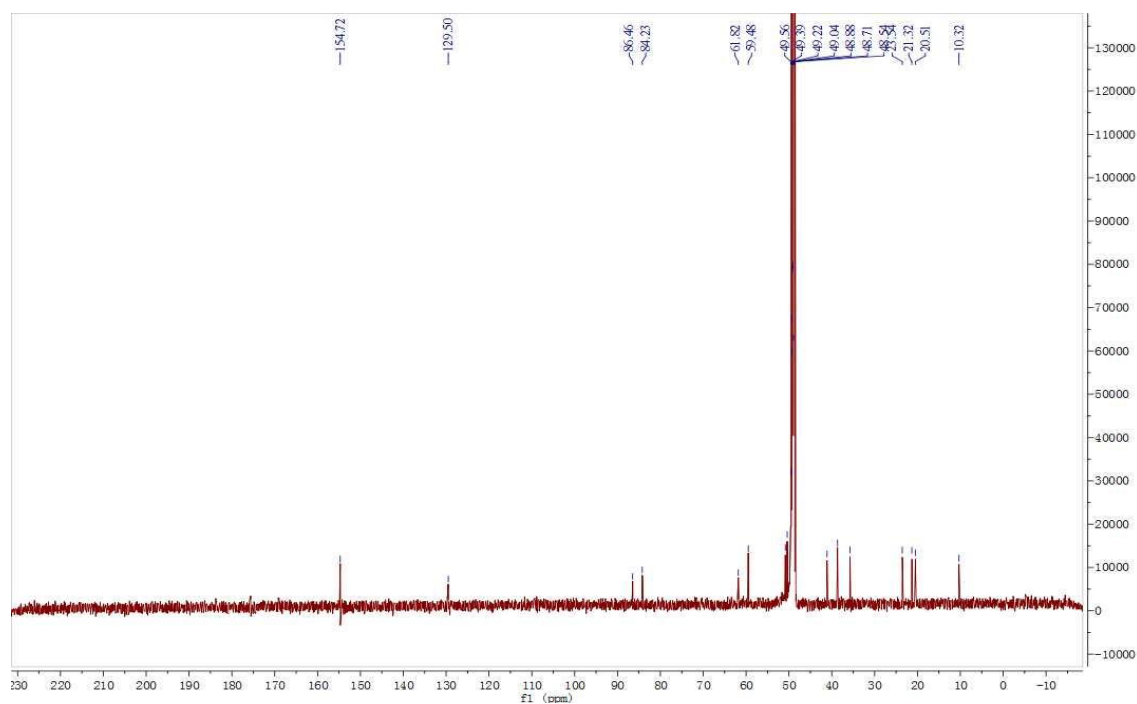**Figure S4.** HMQC Spectrum of sinularianin C (**3**) in  $\text{CD}_3\text{OD}$  (500 MHz).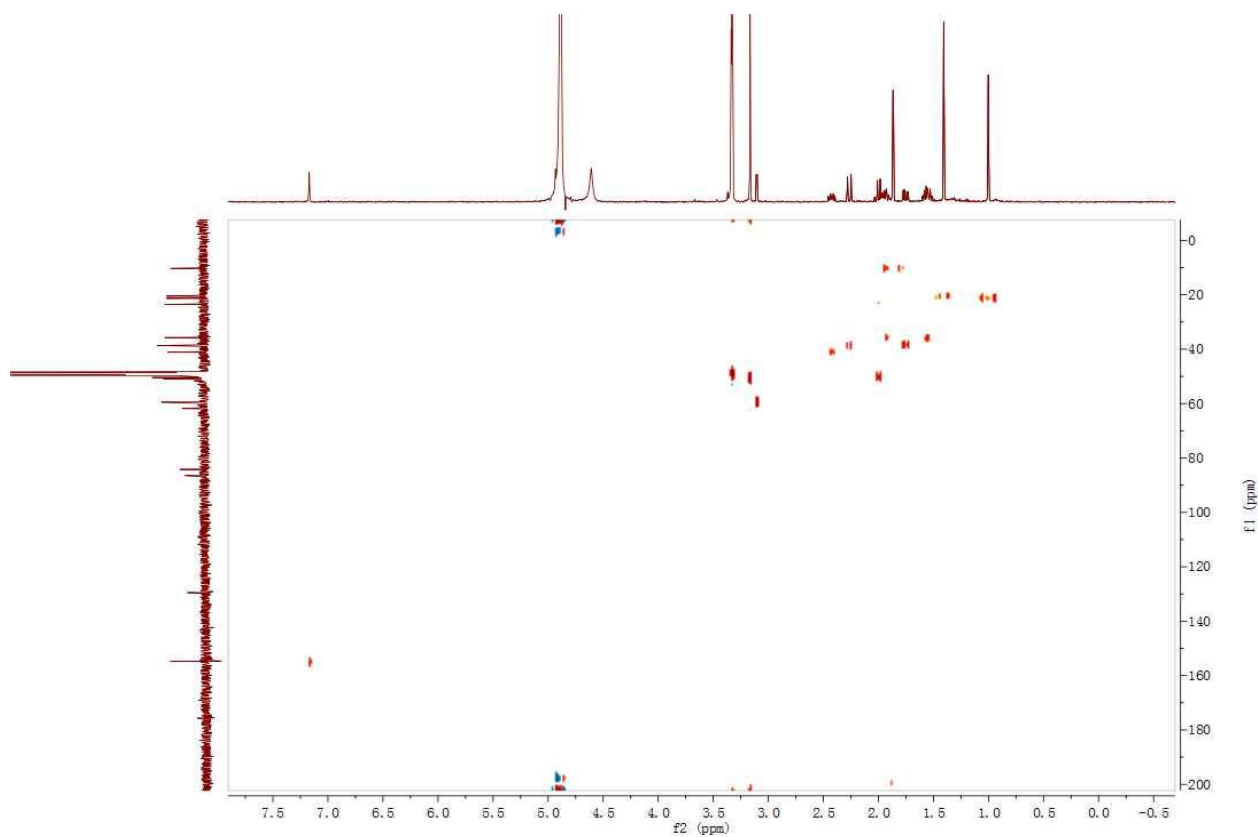

**Figure S5.** HMBC Spectrum of sinularianin C (**3**) in CD<sub>3</sub>OD (500 MHz).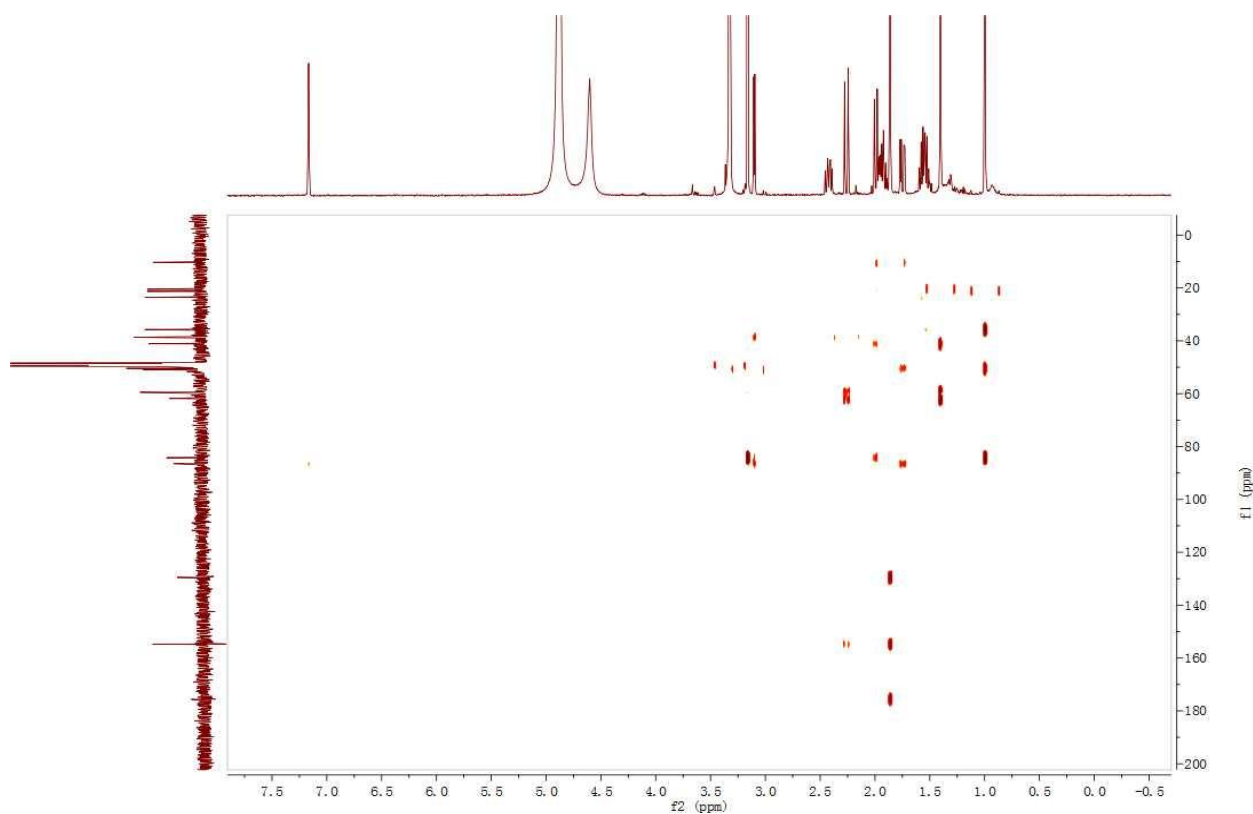**Figure S6.** NOESY Spectrum of sinularianin C (**3**) in CD<sub>3</sub>OD (500 MHz).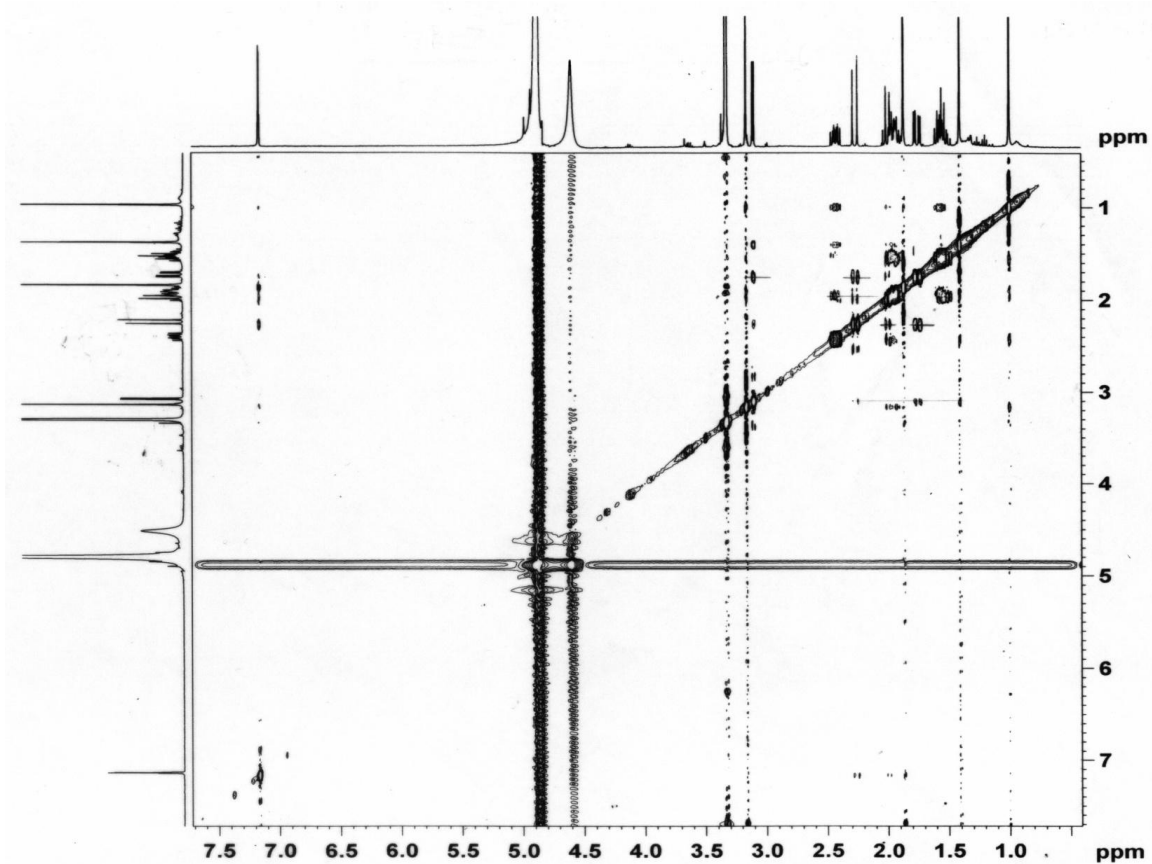

Figure S7. ESI-MS Spectrum of sinularianin D (4).

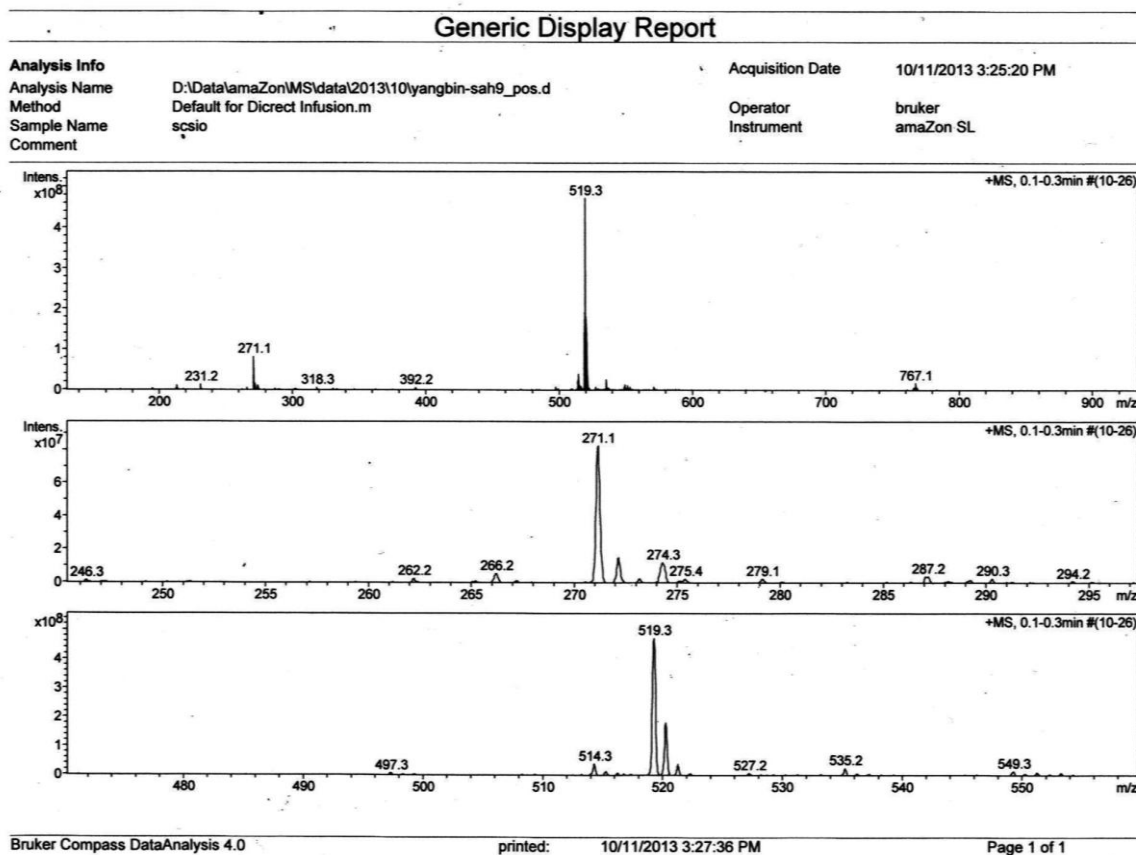

Figure S8. <sup>1</sup>H NMR Spectrum of sinularianin D (4) in CDCl<sub>3</sub> (500 MHz).

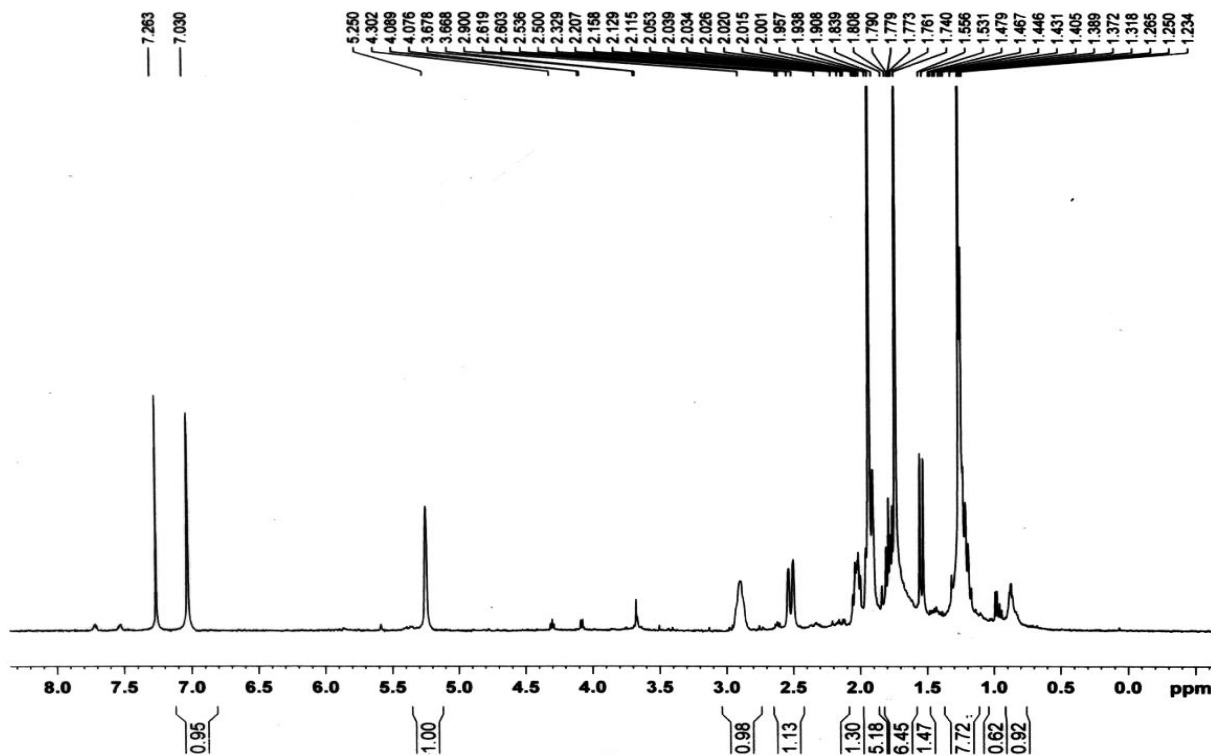

**Figure S9.**  $^{13}\text{C}$  NMR Spectrum of sinularianin D (4) in  $\text{CDCl}_3$  (125 MHz).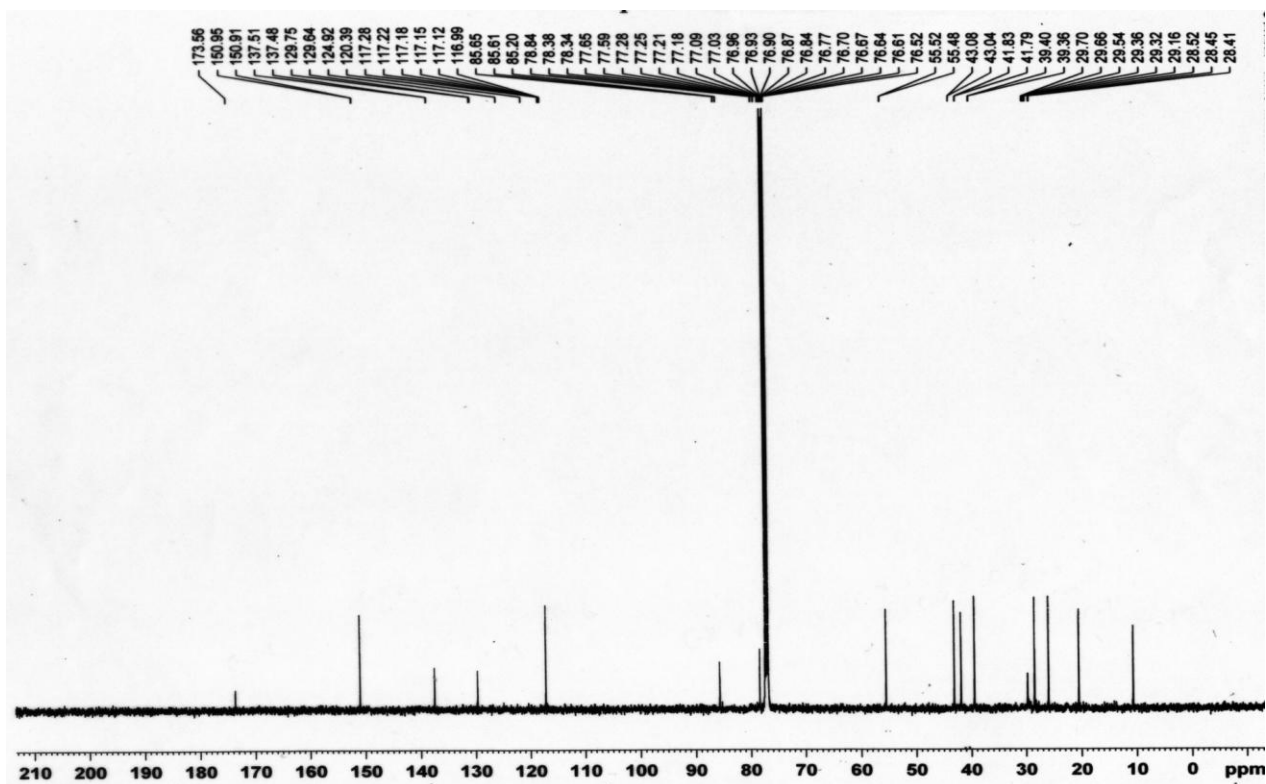**Figure S10.** NOESY Spectrum of sinularianin D (4) in  $\text{CDCl}_3$  (500 MHz).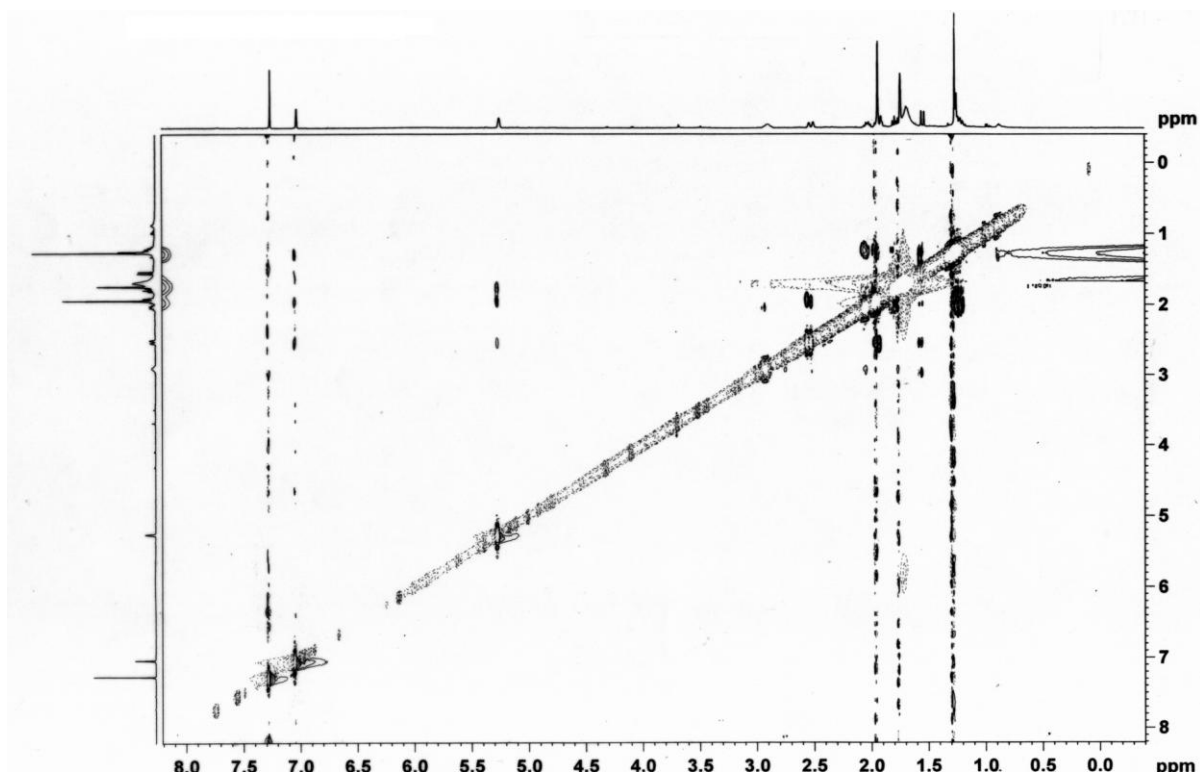

Figure S11. HR-ESI-MS Spectrum of sinularianin E (5).

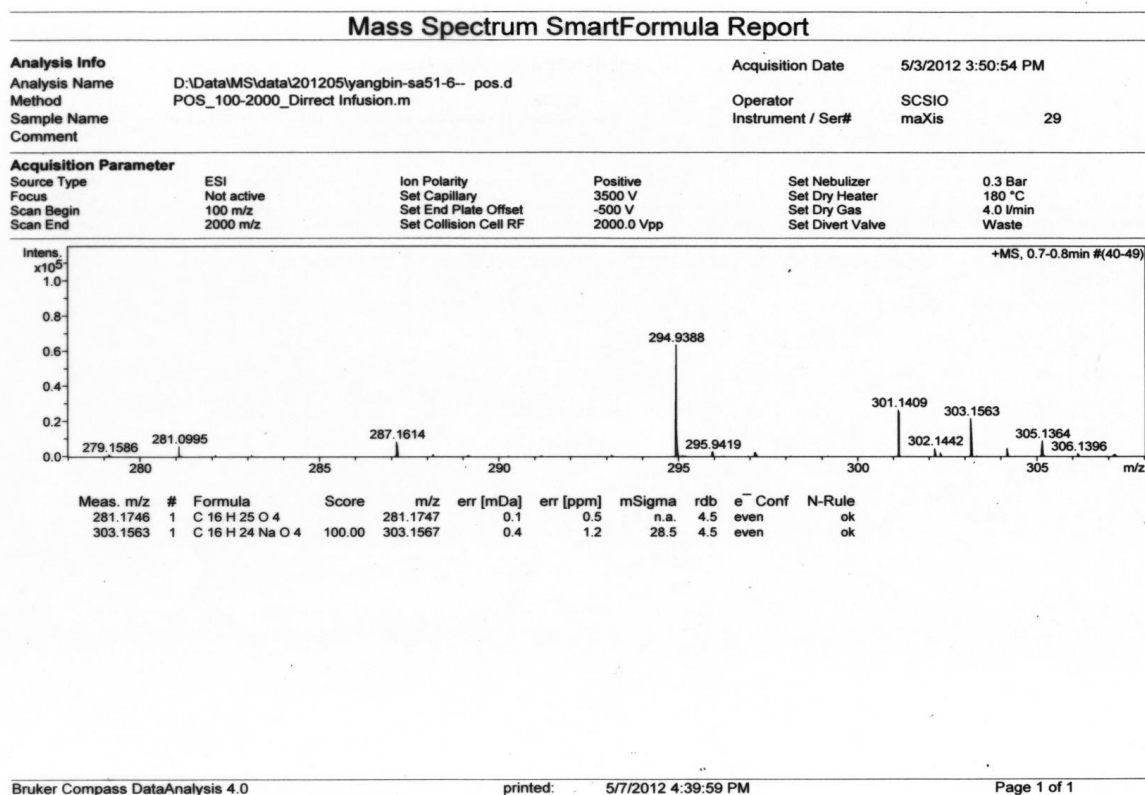Figure S12. <sup>1</sup>H NMR Spectrum of sinularianin E (5) in CDCl<sub>3</sub> (500 MHz).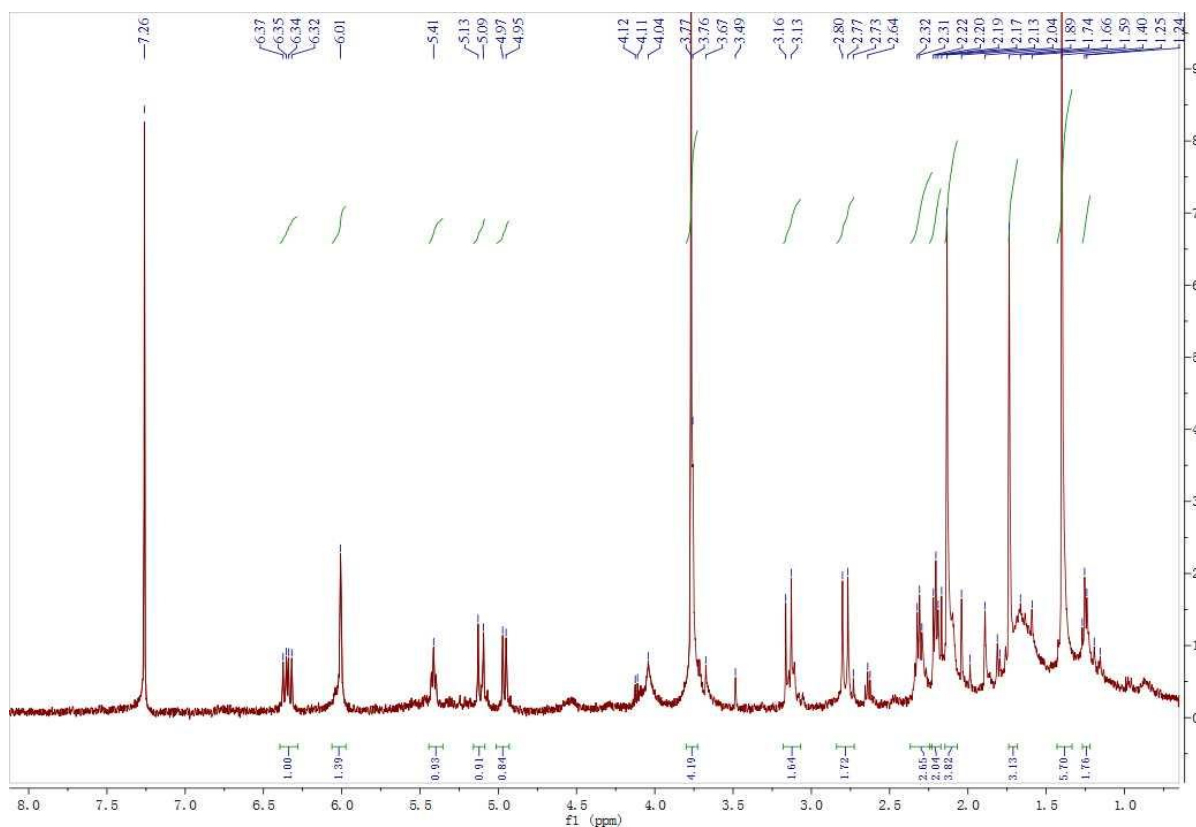

**Figure S13.**  $^{13}\text{C}$  NMR Spectrum of sinularianin E (5) in  $\text{CDCl}_3$  (125 MHz).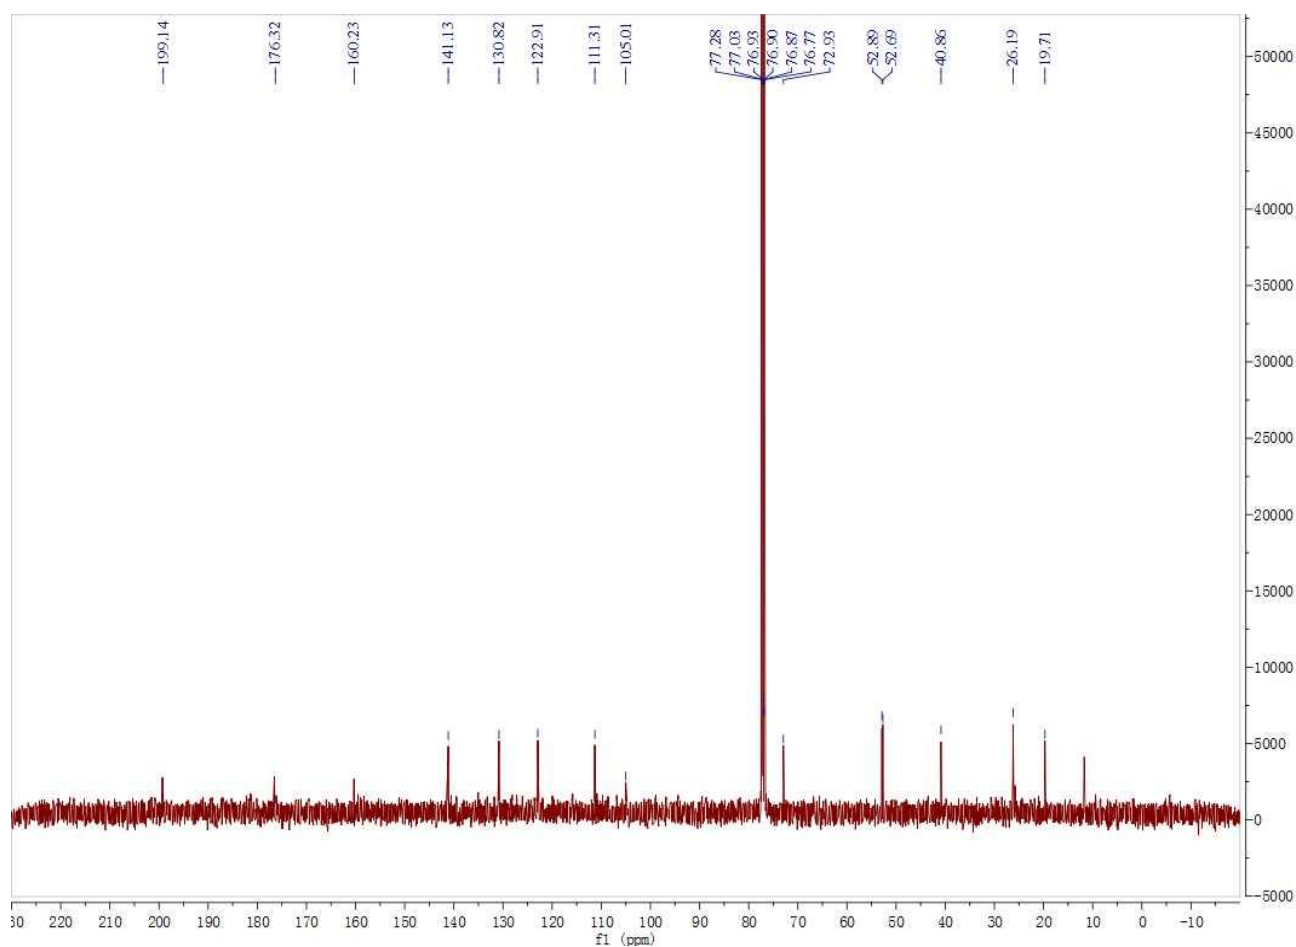**Figure S14.** HMQC Spectrum of sinularianin E (5) in  $\text{CDCl}_3$  (500 MHz).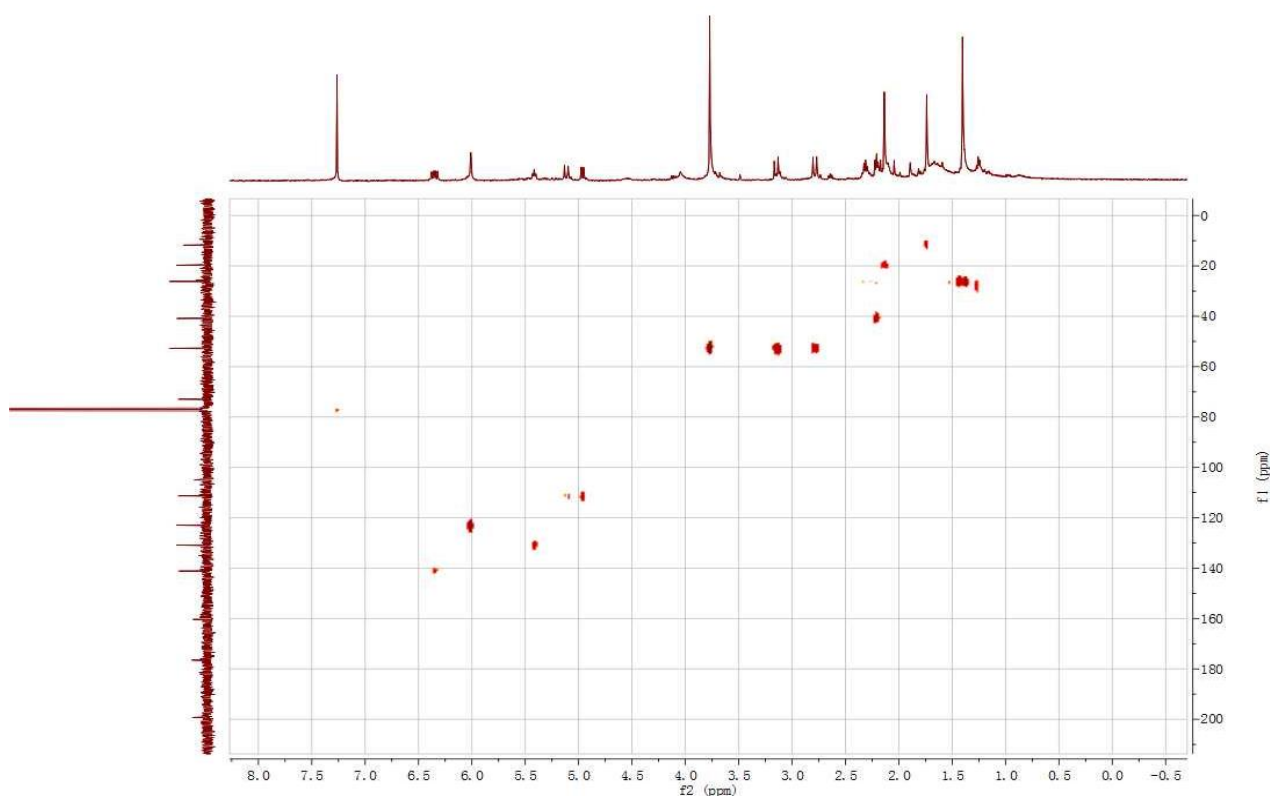

Figure S15. HMBC Spectrum of sinularianin E (5) in CDCl<sub>3</sub> (500 MHz).

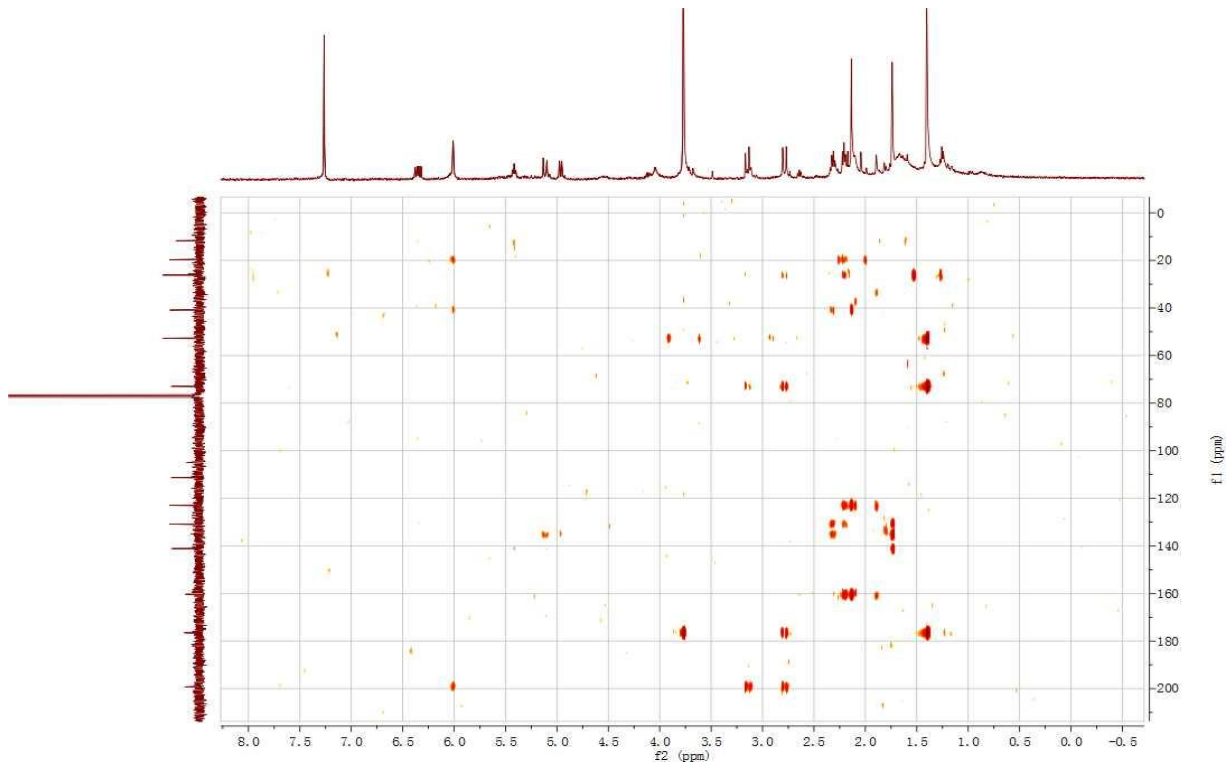

Figure S16. HR-ESI-MS Spectrum of sinularianin F (6).

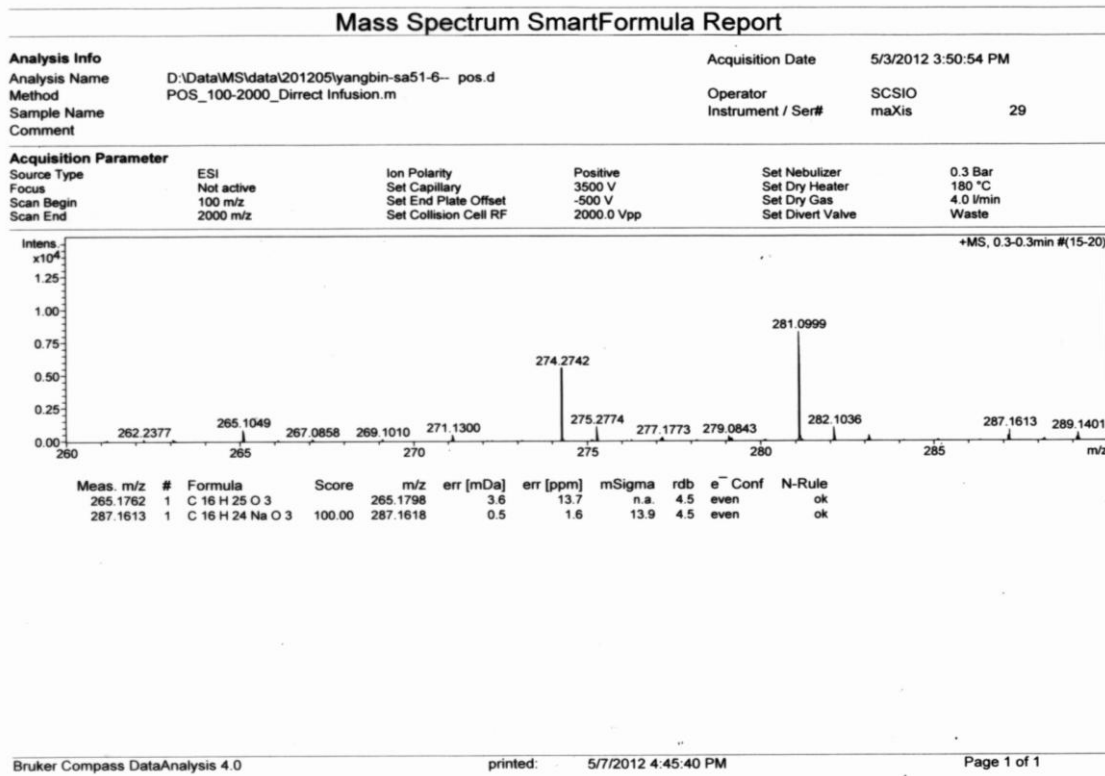



**Figure S17.**  $^1\text{H}$  NMR Spectrum of sinularianin F (**6**) in  $\text{CDCl}_3$  (500 MHz).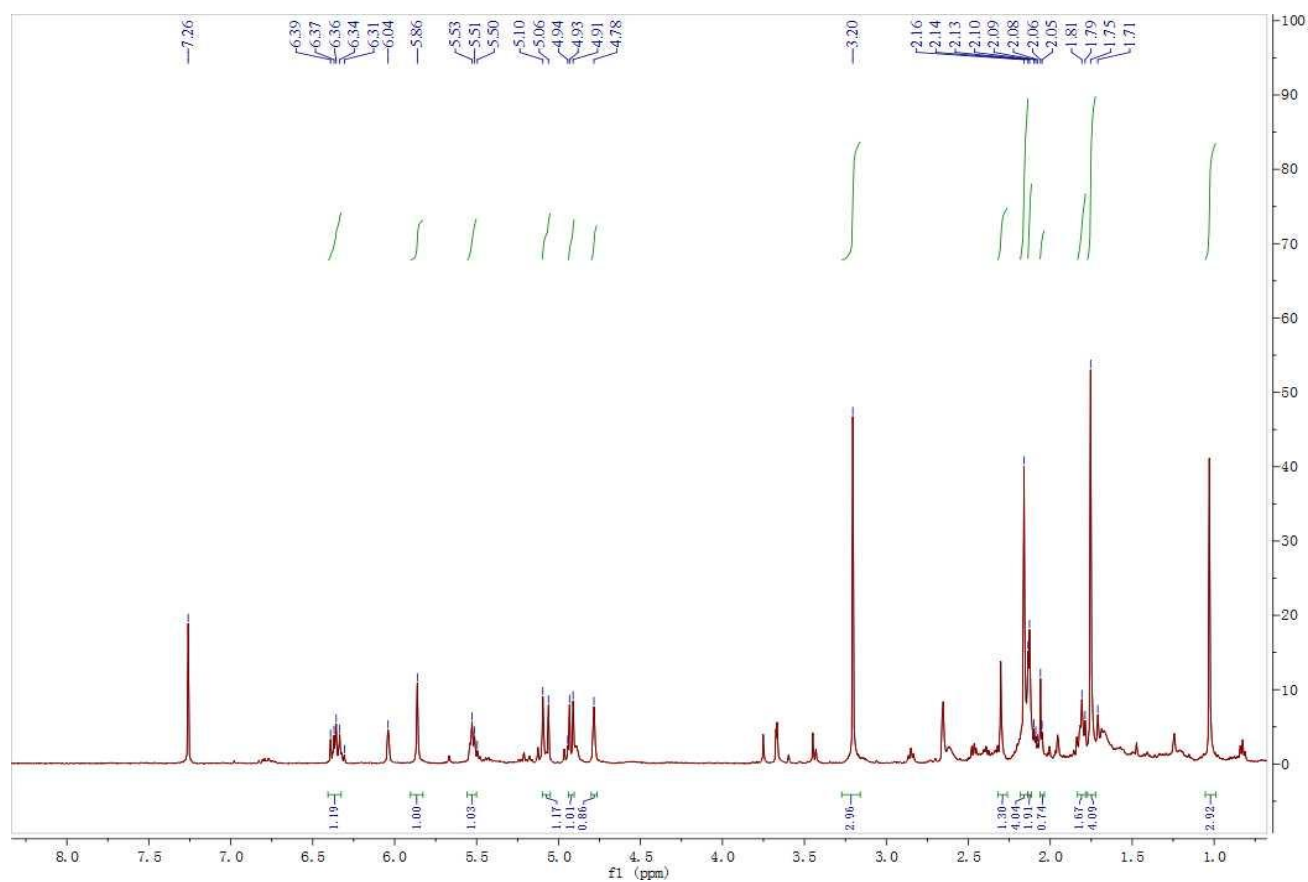**Figure S18.**  $^{13}\text{C}$  NMR Spectrum of sinularianin F (**6**) in  $\text{CDCl}_3$  (125 MHz).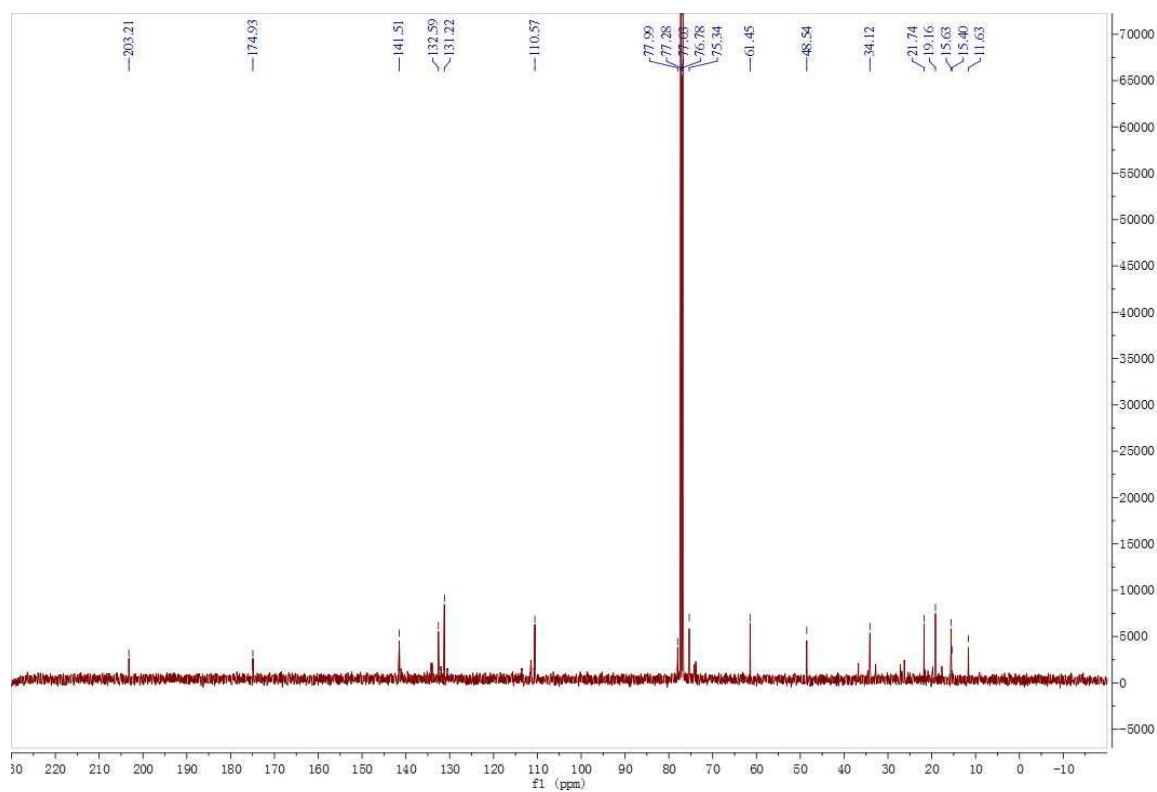

**Figure S19.** HMQC Spectrum of sinularianin F (6) in CDCl<sub>3</sub> (500 MHz).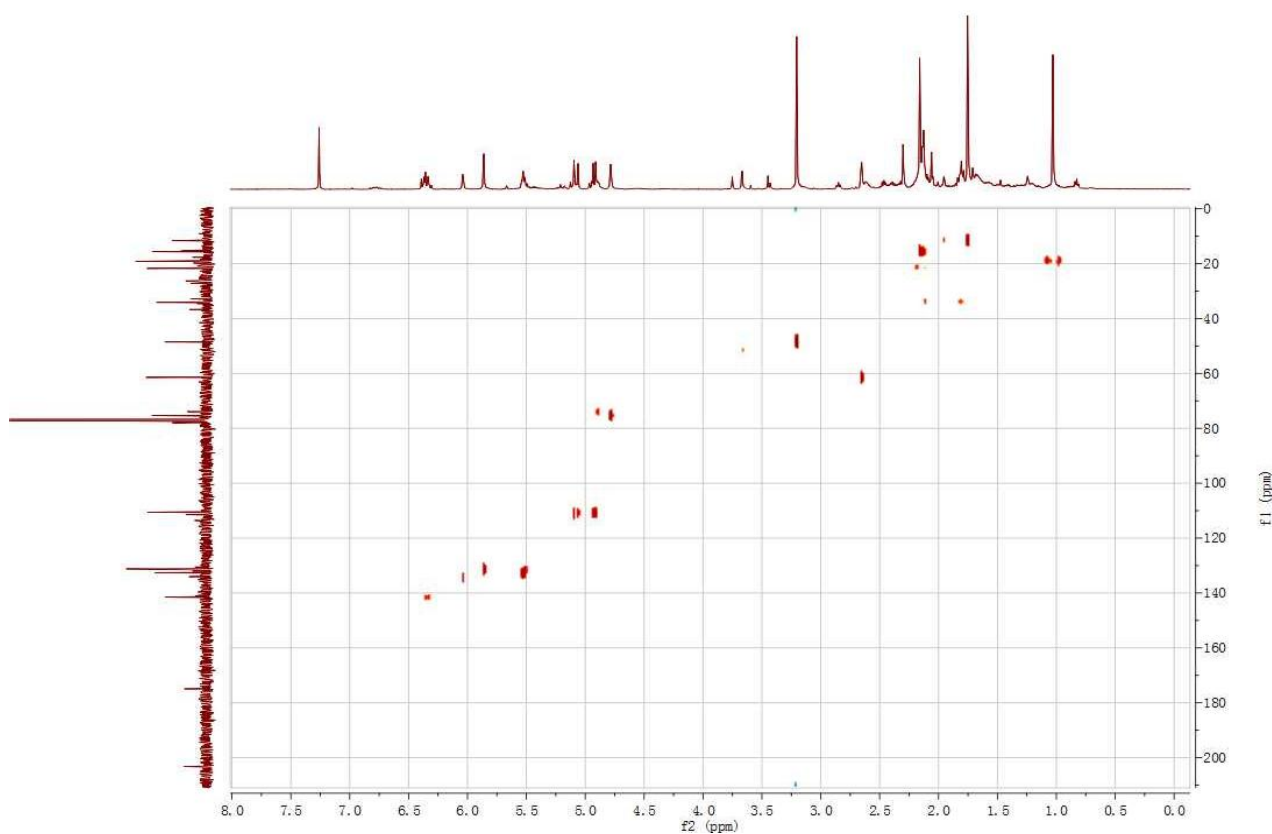**Figure S20.** HMBC Spectrum of sinularianin F (6) in CDCl<sub>3</sub> (500 MHz).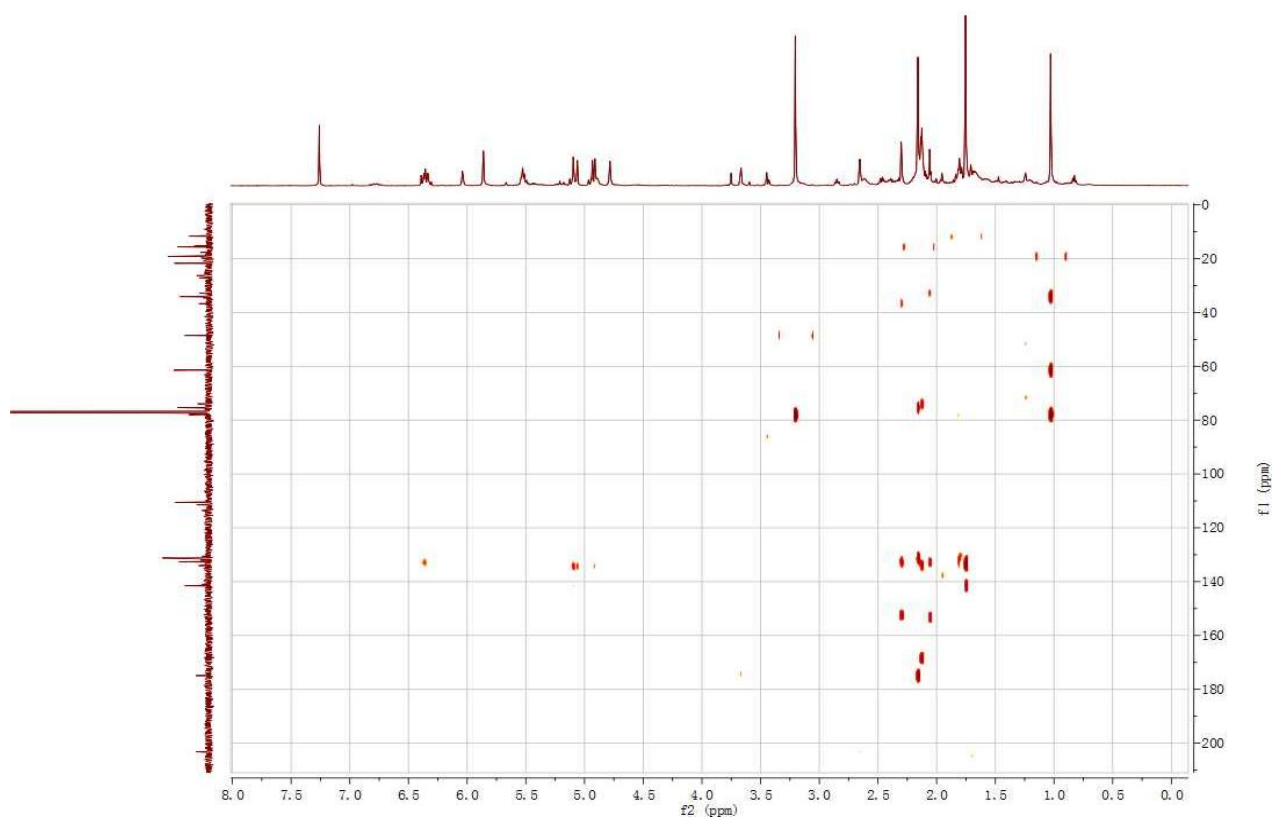

Figure S21. IR Spectra of sinularianin D (4).

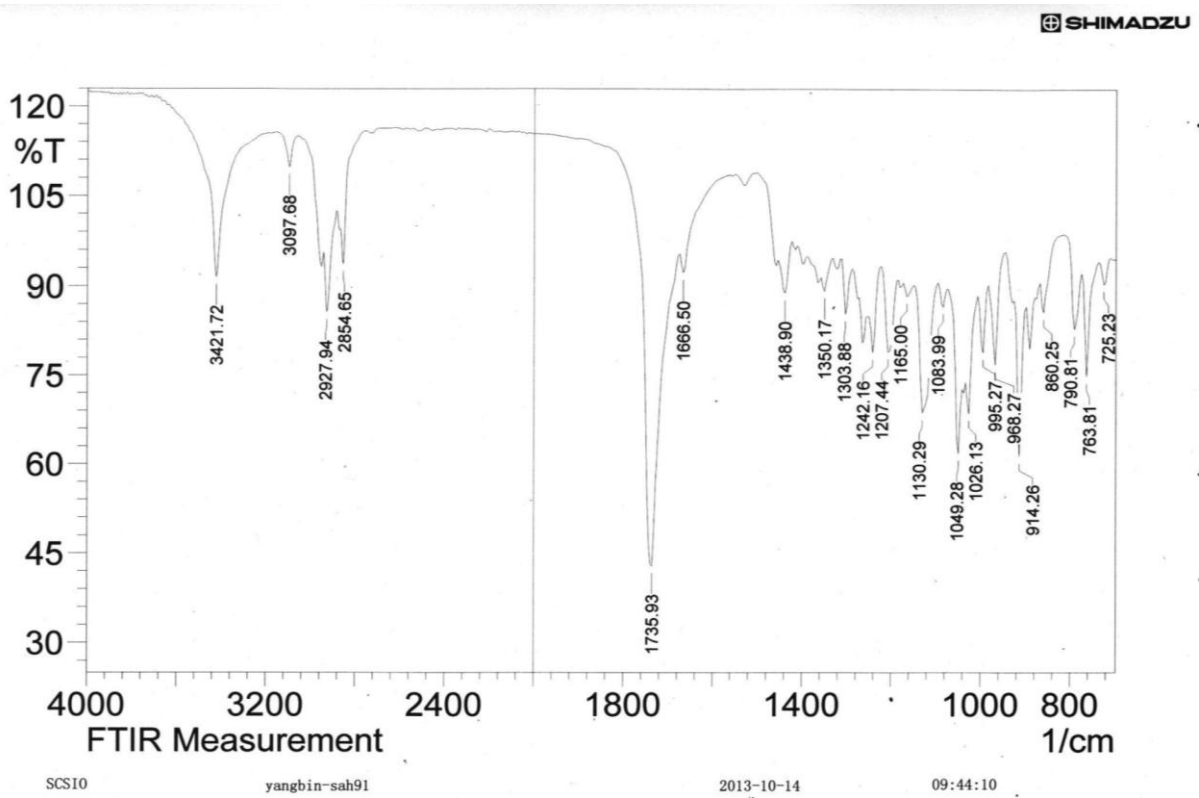

© 2013 by the authors; licensee MDPI, Basel, Switzerland. This article is an open access article distributed under the terms and conditions of the Creative Commons Attribution license (<http://creativecommons.org/licenses/by/3.0/>).
